# Supplementary material for: Improvement of knowledge, attitude and perception of healthcare workers about ADR, a pre- and post-clinical pharmacists' interventional study
Source: PubMed Central journal article supplement — BMJ Open. 2012 Jan 13;2(1):e000367. doi: 10.1136/bmjopen-2011-000367 (PMC3278484; doi:10.1136/bmjopen-2011-000367), 2012-01-13
Supplement: bmjopen-2011-000367.draft_revisions.pdf [file bmjopen-2011-000367.draft_revisions.pdf]

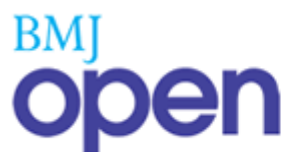

**Improvement of Knowledge, Attitude and Perception of health care workers about ADRs, a pre and post clinical pharmacists' interventional cohort study**

|                                 |                                                                                                                                           |
|---------------------------------|-------------------------------------------------------------------------------------------------------------------------------------------|
| Journal:                        | <i>BMJ Open</i>                                                                                                                           |
| Manuscript ID:                  | bmjopen-2011-000367                                                                                                                       |
| Article Type:                   | Research                                                                                                                                  |
| Date Submitted by the Author:   | 02-Sep-2011                                                                                                                               |
| Complete List of Authors:       | Khalili, Hossein; Tehran University of Medical Sciences, Clinical Pharmacy<br>Mohebbi, Niayesh<br>hendoiee, Narjes<br>Keshtkar, Abbas-Ali |
| <b>Primary Subject Heading</b>: | Pharmacology & therapeutics                                                                                                               |
| Keywords:                       | Medication safety,, Patient safety, Pharmacists, Pharmacoepidemiology                                                                     |
|                                 |                                                                                                                                           |

SCHOLARONE™  
Manuscripts

**Title:**

Improvement of Knowledge, Attitude and Perception of health care workers about ADRs, a pre and post clinical pharmacists' interventional cohort study

**Short title:** ADR and KAP study

**Authors:**

Hossein Khalili<sup>1</sup>, Niayesh Mohebbi<sup>1</sup>, Narjes Hendoiee<sup>1</sup>, Abbas-Ali Keshtkar<sup>2</sup>

1-Clinical Pharmacist, Department of Clinical Pharmacy, Faculty of Pharmacy, Tehran University of Medical Sciences, Tehran, Iran

2-Epidemiologist, Endocrinology and Metabolism Research Center, Tehran University of Medical Sciences- Gasterology and hepatology Research Center, Golestan University of Medical Sciences, Tehran, Iran

Corresponding Author:

Hossein Khalili

Department of Clinical Pharmacy, Faculty of pharmacy, Tehran University of Medical Sciences, Enghelab Ave, Tehran, Iran

Postal Code:1417614411

P.O.Box:14155/6451

Tel: +98-912-2979329

Fax: +98-21-66461178

E-mail: [khalilih@tums.ac.ir](mailto:khalilih@tums.ac.ir)

**Key words:** ADR, KAP, Clinical Pharmacy Interventions

**Word count:** 2131

## Abstract

**Purpose:** Health care workers have an essential role in detection, assessment and spontaneous reporting of adverse drug reactions and accordingly improvement of their related knowledge, attitudes and perception is essential. The goal of this study was evaluation of clinical pharmacists' interventions in improvement of knowledge, attitude and perception about adverse drug reactions in a teaching referral hospital, Tehran, Iran.

**Method:** Changes in knowledge, attitude and perception of health care workers of Imam teaching hospital, were evaluated before and after clinical pharmacists interventions including workshops, meetings and education.

**Results:** From the 100 participated subjects, 82 of them completed the study. Fifty one percent of the health workers have been aware of Iranian Pharmacovigilance Center at ministry of health before intervention and after that all of the participants knew this center. About awareness and detection of adverse drug reactions in patients, 69(84.1%) of health care workers recognized at least one and following interventions it was improved to 73 (89%). Only 7 (8.5%) subjects of participants have reported adverse drug reactions in before intervention phase that were increased significantly to 18 (22%) after intervention.

**Conclusion:** Clinical Pharmacists' interventions were successful in improvement of health care workers' knowledge, attitude, and practice about adverse drug reactions and spontaneous reporting, in Imam teaching hospital.

## Article Summery

**Article focus:** The goal of this study was evaluation of clinical pharmacists' interventions in improvement of knowledge, attitude and perception about adverse drug reactions in a referral teaching hospital, Tehran, Iran.

### Key messages:

-Our results showed that 91.5% of health care workers of Imam teaching hospital that participated in the study never reported any ADR, and 49% were not even aware of Iranian Pharmacovigilance Center.

-Identifying previously unrecognized ADRs was the most important goal for ADR reporting in before and after the interventions phases of the study.

- Regarding this study results, it was suggested that health systems must to have training programs for their workers about importance and how to detect, gather, analyze, report and fallow-up ADRs in the hospital and Provide online and telephone line accesses to facilitate ADRs reporting system.

### Strengths and limitation of this study:

-To the best of our knowledge this is the first survey in Iran that have evaluated clinical pharmacists' interventions in improvement of the health care professionals' knowledge, attitudes and perceptions regarding ADR.

- The most important limitation of our survey was incomplete filled questionnaires.

## Introduction

Adverse drug reactions (ADR) are a major cause of morbidity and mortality around the world[1]. These also have enormous economic burden on health care systems [2, 3]. Pharmacovigilance studies are more important for evaluating medication safety following drugs marketing [4]. Spontaneous ADR reporting by yellow cards is the corn stone of national and international drug safety evaluation in the post marketing phase. Health care workers, especially medical practitioners are the principal contributors of ADR reports[5]. Health care professionals' knowledge, attitudes and perception about ADR spontaneous reporting systems have central role in improvement of medication safety[1,5,-6]. There are some concerns about ADR spontaneous reporting by health care workers including ADR importance, do not know how to report and fill the yellow cards, doubt about adverse effect and suspicious drug ,lack of time, fear of legal problems, avoiding paper works and unavailable yellow card[1,5-7]. World Health Organization standards show that the best spontaneous reporting rate is over 200 reports per 1,000,000 populations per year. Consequently, in Iran with a population of over 70 million, it is expected to have at least 14,000 reports per year that unfortunately only 4,967 reports per year were sent to the Iranian Pharmacovigilance Center (IPC)[6]. The goal of this study was evaluation of clinical pharmacists' interventions in improvement of knowledge, attitude and perception about adverse drug reactions in a referral teaching hospital, Tehran, Iran.

## Method

In this study, changes in knowledge, attitude and perception of health care workers of Imam teaching hospital, were evaluated before and after clinical pharmacists interventional cohort study in the Imam Khomeini Complex hospital during one year period. To assess knowledge, attitude and perception of

1  
2  
3 health care workers about ADR a validate questionnaire [1] was used. In the  
4 first phase of the study, the clinical pharmacists (3 persons) attended in different  
5 medical wards and asked health care workers to participate in the study and fill  
6 the questionnaire. Clinical pharmacists' interventions included training  
7 workshops (providing lectures and group discussion) and continuous providing  
8 information at the hospital general morning report section (every other day)  
9 about ADRs, their importance, seriousness, preventability, necessity of  
10 reporting, and spontaneous reporting system and its advantages. In the  
11 workshop they learned to fill a yellow card and emphasized on reporting any  
12 suspected reaction regardless of uncertainty about the causality. After three  
13 months the same questionnaire were filled again. Then all the data analyzed by  
14 Statistical Package for Social Sciences (SPSS) software version 16.0 for  
15 Windows. Results were reported as frequency and for comparing the before and  
16 after intervention's data, we used Crosstabulation and Chi- Squire. Values less  
17 than 0.05 were considered as significant.

## 35 Results

36  
37  
38 From 100 participated health care workers, 82 questionnaires were filled out  
39 both before and after intervention with same name. The questionnaires that were  
40 filled only in one phases of the study were excluded. Thirty five men and 47  
41 women including 7 (8.5%) physicians, 31 (37.8%) residents, 26 (31.7%) interns,  
42 17 (20.7%) nurses and one (1.2%) pharmacist participated in the study. Average  
43 age of them was 30.9 years with standard deviation of 6.7 years. Mean and  
44 median of practice experience of health care workers included in the study were  
45 9.9 and 9 years, respectively.

46  
47  
48 Fifty one percent (n=42) of the health care workers were aware of IPC at Iranian  
49 ministry of health before interventions and after that all of the participants knew  
50 this center. Four people (4.9%) had attended in an ADR workshop prior to this  
51  
52  
53  
54  
55  
56  
57  
58  
59  
60

1  
2  
3 study. Sixty nine (84.1%) of subjects had recognized at least one ADR in their  
4 practice period and following interventions 73 (89%) of cases have identified  
5 ADR. Only 7 (8.5%) people have reported ADR in first step that increased  
6 significantly to 18 (22%) by the interventions ( $P < 0.001$ ).  
7  
8  
9

10  
11  
12 Two (2.4%) responders have sent the reported ADR to IPC in Tehran, 1 (1.2 %)  
13 to Food and Drug Organization in another city of Iran, 1 (1.2 %) to the  
14 manufacture, and 4 (4.9%) to hospital's ADR center before the interventions and  
15 after that reporting to IPC increased to 17 (20.7%) of cases ( $P < 0.001$ ).  
16  
17  
18

19  
20  
21 Doubt about occurrence of an ADR that was caused underreporting, didn't alter  
22 with the interventions significantly (63.4% vs. 69.5%). Sources of suspected  
23 ADR without reporting were shown in table 1. The interventions had  
24 considerable impact to reduce causes of underreporting including did not know  
25 how to report ( $p = 0.002$ ), yellow card not available ( $p = 0.039$ ), lack of enough  
26 information about the patient ( $p < 0.0001$ ).  
27  
28  
29  
30  
31  
32  
33

34  
35 All types of ADR that might promote health care professionals for reporting  
36 them were improved significantly after clinical pharmacists' interventions  
37 (Table 2).  
38  
39  
40

41  
42 The next question was about health care workers' perception of ADR and  
43 spontaneous ADR reporting goals. As it was indicated in table 3 our  
44 interventions had a significant effect on the participants' total perception about  
45 ADR spontaneous reporting.  
46  
47  
48  
49

50  
51 Responders' idea about spontaneous reporting was not improved significantly  
52 following the clinical pharmacists' interventions (Table 4). Fifty five (67.1%)  
53 and 60 (73.2%) of subjects believed that it is a professional responsibility at pre  
54 and post interventional phases of the study respectively.  
55  
56  
57

58  
59 Regarding their attitude for reporting ADRs the question was; in which of the  
60 following conditions (carbamazepine induced agranulocytosis, hypoglycemia

1  
2  
3 following use of a new hypoglycemic agent, a new statin induced myalgia,  
4 weight loss following fluoxetine therapy in a young women, amoxicillin induced  
5 skin rash, pedal edema following amlodipine therapy, bronchospasm following  
6 use of new beta blocker, and a new antiepileptic induced paresthesias ) you will  
7 fill the yellow card? Only reporting of serious reactions such as carbamazepine  
8 induced agranulocytosis was improved by clinical pharmacists' interventions.  
9  
10  
11  
12  
13  
14  
15  
16

17 The options for ADR reporting have been indicated in table 5. Yellow card,  
18 online, telephone and fax were frequent preferred methods in that order for  
19 ADRs reporting in this study (Table 6). Clinical pharmacists' interventions  
20 improved participants' perception in cases which had no idea about ADRs  
21 reporting methods.  
22  
23  
24  
25  
26

## 27 Discussion

28 To the best of our knowledge this is the first survey in Iran that have evaluated  
29 clinical pharmacists' interventions in improvement of the health care  
30 professionals' knowledge, attitudes and perceptions regarding ADR. ADR  
31 under-reporting among health care workers is a problem in this regard.  
32  
33  
34  
35  
36  
37

38 Our results showed that 91.5% of health care workers of Imam teaching hospital  
39 that participated in the study never reported any ADR, and 49% were not even  
40 aware of IPC being at first phase of the study and obviously improved after  
41 interventions. Iranian pharmacists are more aware about IPC (6) that may be  
42 related to pharmacists more information about drugs and whole ADR point.  
43  
44  
45  
46  
47

48 Before the clinical pharmacists' interventions a little (2.4%) of responders sent  
49 ADR reports to IPC at the Ministry of Health and after that all of reports have  
50 set to this center. It shows that interventions improve participant information  
51 regarding the center responsible for analyzing and managing of their reports. In  
52 previous research in Shiraz, Iran[1], 11% of the reports were sent to this center.  
53  
54  
55  
56  
57  
58  
59  
60 The majority of health care workers in present survey never reported an ADR  
that is comparable with other studies [4,6,8]. In the first phase the main reasons



1  
2  
3 of under reporting were in order of had not enough information from the patient,  
4 too well known to report, did not know how to report, uncertain association, and  
5 being unaware of the existence of a national ADR reporting system.  
6  
7  
8

9  
10 Although there are many studies [9-15] that assess causes of under reporting  
11 ADRs, there are not many of them which evaluating these barriers in hospitals.  
12 In a study performed in a tertiary teaching hospital in Barcelona / Spain results  
13 have been similar to our study that have illustrated lack of time to report due to  
14 the workload of clinical practitioners as the most important reason to ADR  
15 under-reporting. Other causes of under-reporting in that study were lack of  
16 information about the spontaneous reporting system, unavailability of yellow  
17 cards, doubt of ADR causality assessment and lack of patient confidentiality  
18 [9]. The main problems in other studies are similar to these data and included  
19 uncertain association, too trivial to report, too well known to report, yellow card  
20 unavailability, lack of time, and not knowing how to report[10-15]. In this  
21 regard clinical pharmacists of Imam Hospital decided to have interventions to  
22 improve these problems.  
23  
24  
25  
26  
27  
28  
29  
30  
31  
32  
33  
34  
35  
36  
37

38 This is clear that all kind of ADR related to all drugs have not been reported  
39 sufficiently. In present study serious and unusual reactions, unrecognized ADR,  
40 and reactions to a new product were expressed more important ADR for  
41 reporting by the participants. This was as the same as other studies' results[16-  
42 20]. We found only one study in Turkey that the idea of reporting all kind of  
43 ADRs was more often among pharmacist than reporting only serious and  
44 unexpected reactions [21]. After the study's interventions as was shown in the  
45 result section, believe of all kind of reactions reporting have been increased  
46 significantly.  
47  
48  
49  
50  
51  
52  
53  
54  
55  
56  
57

58 Identifying previously unrecognized ADRs was the most important goal for  
59 ADR reporting in before and after the interventions phases of the study. This  
60

1  
2  
3 was also reported by other studies [22,23]. Regarding the influence of the  
4 clinical pharmacists' interventions on modifying health care workers' practice,  
5 just reporting carbamazepine induced agranulocytosis shown a significant  
6 change, that is indicated reporting of a serious reaction.  
7  
8  
9  
10

11  
12 The preferred method to report ADRs was yellow card followed by online  
13 report in both before and after the interventions, while in previous study in Iran,  
14 Phone was the ideal method following yellow cards for pharmacists[1].  
15  
16  
17

18  
19 The most important limitation of our survey was incomplete filled  
20 questionnaires; consequently we couldn't enroll all 100 questionnaires for the  
21 analysis.  
22  
23  
24

25  
26 Regarding this study results, it was suggested that health systems must to have  
27 training programs for their workers about importance and how to detect,  
28 gather, analyze, report and fallow-up ADRs in the hospital and Provide online  
29 and telephone line accesses to facilitate ADRs reporting system.  
30  
31  
32  
33

34  
35 In conclusion clinical pharmacists' interventions can improve knowledge,  
36 attitude, and perception of health car workers about ADR spontaneous  
37 reporting, that is a great issue of importance regarding pharmacovigilance and  
38 public health.  
39  
40  
41  
42

#### 43 44 **Authorship:**

45  
46 Hossein khalili: Clinical pharmacist of the hospital and provided educational  
47 programs for the participants to the study and manuscript revision.  
48  
49

50  
51 Niayesh Mohebbi: Data gathering and manuscript preparation.  
52  
53

54  
55 Narjes Hendoiee: Data gathering.  
56  
57

58  
59 Abbas-Ali Keshtkar: Study design and statistical analysis.  
60

**Acknowledgements:** This study was supported by a grant from Office of Vice-Chancellor for Research of Tehran University of Medical Sciences.

**Conflict of interest:** There is not any competing interest for all authors about present work.

**Founding:** We have not any founding resource.

## Reference:

1. Vessal G, Mardani Z, Mollai M. Knowledge, attitudes, and perceptions of pharmacists to ADR reporting in Iran. *Pharm World Sci* 2009;**31**:183–187.
2. Lazarou J, Pomeranz BH, Corey PH. Incidence of ADR in hospitalized patients: a meta-analysis of prospective studies. *JAMA*1998;**279**:1200-1205.
3. Millar JS. Consultation owing to ADR in a single practice. *Br J Gen Pract* 2001;**51**:130-1.
4. Figueiras A, Tato F, Fontaiñas J, et al. Physicians' attitudes towards voluntary reporting of adverse drug events. *J Eval Clin Pract* 2001;**7**:347-54.
5. Rawlins MD. Pharmacovigilance: paradise lost, regained or postponed? The William Withering Lecture 1994. *J R Coll Physicians Lond* 1995;**29**:41-9.
6. Vallano A, Cereza G, Pedròs C, et al. Obstacles and solutions for spontaneous reporting of ADRs in the hospital. *Br J Clin Pharmacol* 2005;**60**:653–658.
7. Salehifar E., Ala SH., Gholami KH., Knowledge, attitudes, and perceptions of pharmacists and Nurses ADR reporting in Mazandaran ,Iran. *Mazandaran university of medical science journal* 2007;**56**:115-125.
8. Cosentino M, Leoni O, Oria C, et al. Hospital-based Survey of Doctors' Attitudes to ADRs and Perception of Drug-related Risk for Adverse Reaction Occurrence. *Pharmacoepidemiol Drug Safety* 1999;**8**:S27-S35.
9. Evans SM, Berry JG, Smith BJ, et al. Attitudes and barriers to incident reporting: a collaborative hospital study. *Qual Saf Health Care* 2006;**15**:39–43.
10. Bateman DN, Sanders GL, Rawlins MD. Attitudes to ADR reporting in the Northern Region. *Br J Clin Pharmacol* 1992;**34**: 421–6.
11. Belton KJ, Lewis SC, Payne S, et al. Attitudinal survey of ADR reporting by medical practitioners in the United Kingdom. *Br J Clin Pharmacol* 1995;**39**:223–6.

12. Eland IA, Belton KJ, van Grootheest AC, et al. Attitudinal survey of voluntary reporting of ADR. *Br J Clin Pharmacol* 1999;**48**:623–7.
13. Bäckström M, Mjorndal T, Dahlqvist R, et al. Attitudes to reporting ADR in northern Sweden. *Eur J Clin Pharmacol* 2000;**56**:729–32.
14. McGettigan P, Feely J. ADR reporting: opinions and attitudes of medical practitioners in Ireland. *Pharmacoepidemiol Drug Saf* 1995;**4**:355–8.
15. Belton KJ. Attitude survey of adverse drug-reaction reporting by health care professionals across the European Union. The European Pharmacovigilance Research Group. *Eur J Clin Pharmacol* 1997;**52**:423–7.
16. Green CF, Mottram DR, Rowe PH, et al. Attitudes and knowledge of hospital pharmacists to ADR reporting. *Br J Clin Pharmacol* 2001;**51**:81–6.
17. Lee KK, Chan TY, Raymond K, et al. Pharmacists' attitudes toward ADRs reporting in Hong Kong. *Ann Pharmacother* 1994;**28**:1400–3.
18. Sweis D, Wong IC. A survey on factors that could affect ADR reporting according to hospital pharmacists in Great Britain. *Drug Saf* 2000;**23**:165–72.
19. Generali JA, Danish MA, Rosenbaum SE. Knowledge of and attitudes about ADR reporting among Rhode Island pharmacists. *Ann Pharmacother* 1995;**29**:365–9.
20. Figueiras A, Tato F, Fontainas J, et al. Physicians' attitudes towards voluntary reporting of adverse drug events. *J Eval Clin Pract* 2001;**7**:347–54.
21. Zerrin Toklu H, Uysal MK. The knowledge and attitude of the Turkish community pharmacists toward pharmacovigilance in the Kadikoy district of Istanbul. *Pharm World Sci* 2008;**30**:556– 62.
22. Belton KJ, Lewis SC, Payne S, et al. Attitudinal survey of ADR reporting by medical practitioners in the United Kingdom. *Br J Clin Pharmacol* 1995;**39**:223–6.
23. Cosentino M, Leoni O, Banfi F, et al. Attitudes to ADR reporting by medical practitioners in a northern Italian district. *Pharmacol Res* 1997;**35**:85–8.

Table 1 - Causes of suspected ADR without reporting

| Reason                                                      | Before intervention | After intervention | P value |
|-------------------------------------------------------------|---------------------|--------------------|---------|
| Uncertain association between reaction and drug             | 18(22)              | 17(20.7)           | 1       |
| Unimportant to report                                       | 13(15.9)            | 11(9)              | 0.30    |
| Well known that don't need to be reported                   | 21(25.6)            | 16(19.5)           | 0.23    |
| Unaware of the existence of a national ADR reporting system | 17(20.7)            | 15(18.3)           | 0.62    |
| Did not know importance of reporting                        | 12(14.6)            | 10(12.2)           | 0.69    |
| Did not know how to report                                  | 20(24.4)            | 12(14.6)           | 0.02    |
| Lack of time                                                | 11(13.4)            | 16 (19.50)         | 0.18    |
| Lack of financial reimbursement                             | 2(2.4)              | 2(2.4)             | 1       |
| Fear of legal liability                                     | 2(2.4)              | 2(2.4)             | 1       |
| Yellow card not available                                   | 16(19.5)            | 9(11)              | 0.04    |
| Reporting system is too technical                           | 18(9.8)             | 14(4.9)            | 0.12    |
| Not enough information from the patient                     | 82(100)             | 3(3.7)             | 0.0001  |

Table 2 - Reactions characteristics that might encourage health care professionals to report

| Factor                                                                            | Before intervention | After intervention | P value |
|-----------------------------------------------------------------------------------|---------------------|--------------------|---------|
| A serious reaction                                                                | 53(64.6)            | 74(90.2)           | <0.001  |
| Unusual reaction                                                                  | 38(46.3)            | 66(80.5)           | <0.001  |
| Reaction of a new product                                                         | 36(43.9)            | 46(56.1)           | 0.02    |
| Reaction not reported before for a particular drug                                | 36(43.9)            | 66(80.5)           | <0.001  |
| Reaction is well recognized for a particular drug                                 | 8(9.8)              | 31(37.8)           | <0.001  |
| Any reaction (serious or non-serious, well-known or new) to an old or new product | 7(20.7)             | 26(31.7)           | 0.004   |

Table 3 - Health care workers' perception of ADR and spontaneous reporting purposes, before and after intervention.

| Purpose                                                    | Before intervention | After intervention | P value |
|------------------------------------------------------------|---------------------|--------------------|---------|
| To enable safe drugs to be identified                      | 36(43.9)            | 46(56.1)           | 0.02    |
| To measure the incidence of ADR                            | 39(47.6)            | 57(69.5)           | <0.001  |
| To identify factors which might predispose to ADR          | 35(42.7)            | 58(70.7)           | <0.001  |
| To identify previously unrecognized ADRs                   | 56(68.3)            | 70(85.4)           | <0.001  |
| To compare ADRs for drugs in similar therapeutic classes   | 36(43.9)            | 52(63.4)           | <0.001  |
| To compare ADRs of same drug from different drug companies | 44(53.7)            | 44(53.7)           | 1       |

Table 4- Believes about spontaneous reporting, before and after intervention

| Believes about spontaneous reporting                       | Before intervention | After intervention | P value |
|------------------------------------------------------------|---------------------|--------------------|---------|
| Professional responsibility                                | 55(67.1)            | 60(73.2)           | 0.12    |
| Felt that one report can not modify the health-care system | 6(7.3)              | 6(7.3)             | 1       |
| All serious ADRs were recognized before drug marketing     | 3(3.7)              | 1(1.2)             | 0.5     |
| Completely aware of what should be reported                | 4(4.9)              | 8(9.8)             | 0.06    |
| Yellow-cards are too complicated                           | 19(23.2)            | 18(22)             | 1       |



Table 5 – Health care workers' attitude for reporting; some instances of ADR

| Event                                                                               | Category of reaction                               | Report before the intervention | Report after the intervention | P value |
|-------------------------------------------------------------------------------------|----------------------------------------------------|--------------------------------|-------------------------------|---------|
| Carbamazepine induced agranulocytosis                                               | serious                                            | 30(36.6)                       | 74(90.2)                      | <0.001  |
| Hypoglycemic coma of a new diabetes medication                                      | Serious for a new drug                             | 48(58.5)                       | 45(54.9)                      | 0.72    |
| Myalgia with a new statin                                                           | New drug                                           | 19(23.2)                       | 20(14.2)                      | 1       |
| Weight loss after 8 week of fluoxetine                                              | well recognized for a particular drug              | 69(7.3)                        | 13(15.9)                      | 0.14    |
| Rash with amoxicillin after 6 days                                                  | well recognized for a particular drug              | 18(22)                         | 12(14.6)                      | 0.33    |
| Foot edema after 4 month amlodipine                                                 | well recognized for a particular drug              | 19(23.2)                       | 18(22)                        | 1       |
| Pain and tingling of tongue after two weeks of a new anti- seizure                  | Reaction not reported before for a particular drug | 33(40.2)                       | 40(48.8)                      | 0.34    |
| Bronchospasm in an asmatic patient after the first administration of a beta-blocker | Serious well recognized for a particular drug      | 33(40.2)                       | 29(35.4)                      | 0.63    |

Table 6- Health care workers' preferred method of reporting

| Preferred method | Before intervention | After intervention | P value |
|------------------|---------------------|--------------------|---------|
| Yellow Card      | 29(32)              | 34(45.1)           | 0.09    |
| Telephone        | 18(24.3)            | 16(21.6)           | 0.21    |
| Fax              | 1(1.4)              | 0                  | 0.33    |
| Online           | 21(28.4)            | 23(31.1)           | 0.45    |
| None             | 5(6.8)              | 1(1.4)             | 0.02    |

For peer review only

STROBE 2007 (v4) Statement—Checklist of items that should be included in reports of *cohort studies*

| Section/Topic                | Item # | Recommendation                                                                                                                                                                       | Reported on page # |
|------------------------------|--------|--------------------------------------------------------------------------------------------------------------------------------------------------------------------------------------|--------------------|
| Title and abstract           | 1      | (a) Indicate the study's design with a commonly used term in the title or the abstract                                                                                               | 1                  |
|                              |        | (b) Provide in the abstract an informative and balanced summary of what was done and what was found                                                                                  | 2                  |
| <b>Introduction</b>          |        |                                                                                                                                                                                      |                    |
| Background/rationale         | 2      | Explain the scientific background and rationale for the investigation being reported                                                                                                 | 3                  |
| Objectives                   | 3      | State specific objectives, including any prespecified hypotheses                                                                                                                     | 3                  |
| <b>Methods</b>               |        |                                                                                                                                                                                      |                    |
| Study design                 | 4      | Present key elements of study design early in the paper                                                                                                                              | 3                  |
| Setting                      | 5      | Describe the setting, locations, and relevant dates, including periods of recruitment, exposure, follow-up, and data collection                                                      | 3-4                |
| Participants                 | 6      | (a) Give the eligibility criteria, and the sources and methods of selection of participants. Describe methods of follow-up                                                           | 3-4                |
|                              |        | (b) For matched studies, give matching criteria and number of exposed and unexposed                                                                                                  |                    |
| Variables                    | 7      | Clearly define all outcomes, exposures, predictors, potential confounders, and effect modifiers. Give diagnostic criteria, if applicable                                             | 4                  |
| Data sources/<br>measurement | 8*     | For each variable of interest, give sources of data and details of methods of assessment (measurement). Describe comparability of assessment methods if there is more than one group | 4                  |
| Bias                         | 9      | Describe any efforts to address potential sources of bias                                                                                                                            |                    |
| Study size                   | 10     | Explain how the study size was arrived at                                                                                                                                            | 4                  |
| Quantitative variables       | 11     | Explain how quantitative variables were handled in the analyses. If applicable, describe which groupings were chosen and why                                                         | 4                  |
| Statistical methods          | 12     | (a) Describe all statistical methods, including those used to control for confounding                                                                                                | 4                  |
|                              |        | (b) Describe any methods used to examine subgroups and interactions                                                                                                                  | 4                  |
|                              |        | (c) Explain how missing data were addressed                                                                                                                                          | 4                  |
|                              |        | (d) If applicable, explain how loss to follow-up was addressed                                                                                                                       | 4                  |
|                              |        | (e) Describe any sensitivity analyses                                                                                                                                                | 4                  |
| <b>Results</b>               |        |                                                                                                                                                                                      | 4                  |

|                          |     |                                                                                                                                                                                                              |     |
|--------------------------|-----|--------------------------------------------------------------------------------------------------------------------------------------------------------------------------------------------------------------|-----|
| Participants             | 13* | (a) Report numbers of individuals at each stage of study—eg numbers potentially eligible, examined for eligibility, confirmed eligible, included in the study, completing follow-up, and analysed            | 5   |
|                          |     | (b) Give reasons for non-participation at each stage                                                                                                                                                         | 5   |
|                          |     | (c) Consider use of a flow diagram                                                                                                                                                                           |     |
| Descriptive data         | 14* | (a) Give characteristics of study participants (eg demographic, clinical, social) and information on exposures and potential confounders                                                                     | 5   |
|                          |     | (b) Indicate number of participants with missing data for each variable of interest                                                                                                                          | 5   |
|                          |     | (c) Summarise follow-up time (eg, average and total amount)                                                                                                                                                  | 5   |
| Outcome data             | 15* | Report numbers of outcome events or summary measures over time                                                                                                                                               | 5-6 |
| Main results             | 16  | (a) Give unadjusted estimates and, if applicable, confounder-adjusted estimates and their precision (eg, 95% confidence interval). Make clear which confounders were adjusted for and why they were included |     |
|                          |     | (b) Report category boundaries when continuous variables were categorized                                                                                                                                    |     |
|                          |     | (c) If relevant, consider translating estimates of relative risk into absolute risk for a meaningful time period                                                                                             |     |
| Other analyses           | 17  | Report other analyses done—eg analyses of subgroups and interactions, and sensitivity analyses                                                                                                               |     |
| <b>Discussion</b>        |     |                                                                                                                                                                                                              |     |
| Key results              | 18  | Summarise key results with reference to study objectives                                                                                                                                                     | 7   |
| <b>Limitations</b>       |     |                                                                                                                                                                                                              |     |
| Interpretation           | 20  | Give a cautious overall interpretation of results considering objectives, limitations, multiplicity of analyses, results from similar studies, and other relevant evidence                                   | 8   |
| Generalisability         | 21  | Discuss the generalisability (external validity) of the study results                                                                                                                                        | 8   |
| <b>Other information</b> |     |                                                                                                                                                                                                              |     |
| Funding                  | 22  | Give the source of funding and the role of the funders for the present study and, if applicable, for the original study on which the present article is based                                                | 8   |

\*Give information separately for cases and controls in case-control studies and, if applicable, for exposed and unexposed groups in cohort and cross-sectional studies.

**Note:** An Explanation and Elaboration article discusses each checklist item and gives methodological background and published examples of transparent reporting. The STROBE checklist is best used in conjunction with this article (freely available on the Web sites of PLoS Medicine at <http://www.plosmedicine.org/>, Annals of Internal Medicine at <http://www.annals.org/>, and Epidemiology at <http://www.epidem.com/>). Information on the STROBE Initiative is available at [www.strobe-statement.org](http://www.strobe-statement.org).

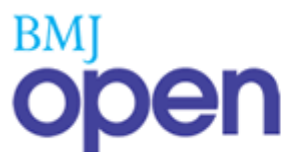

**Improvement of Knowledge, Attitude and Perception of health care workers about ADR, a pre and post clinical pharmacists' interventional cohort study**

|                                 |                                                                                                                                                                      |
|---------------------------------|----------------------------------------------------------------------------------------------------------------------------------------------------------------------|
| Journal:                        | <i>BMJ Open</i>                                                                                                                                                      |
| Manuscript ID:                  | bmjopen-2011-000367.R1                                                                                                                                               |
| Article Type:                   | Research                                                                                                                                                             |
| Date Submitted by the Author:   | 20-Sep-2011                                                                                                                                                          |
| Complete List of Authors:       | Khalili, Hossein; Tehran University of Medical Sciences, Clinical Pharmacy<br>Mohebbi, Niayesh<br>hendoiee, Narjes<br>Keshtkar, Abbas-Ali<br>Dashti-Khavidaki, Simin |
| <b>Primary Subject Heading</b>: | Pharmacology & therapeutics                                                                                                                                          |
| Keywords:                       | Medication safety,, Patient safety, Pharmacists, Pharmacoepidemiology                                                                                                |
|                                 |                                                                                                                                                                      |

SCHOLARONE™  
Manuscripts

STROBE 2007 (v4) Statement—Checklist of items that should be included in reports of *cohort studies*

| Section/Topic                | Item # | Recommendation                                                                                                                                                                       | Reported on page # |
|------------------------------|--------|--------------------------------------------------------------------------------------------------------------------------------------------------------------------------------------|--------------------|
| Title and abstract           | 1      | (a) Indicate the study's design with a commonly used term in the title or the abstract                                                                                               | 1                  |
|                              |        | (b) Provide in the abstract an informative and balanced summary of what was done and what was found                                                                                  | 2                  |
| <b>Introduction</b>          |        |                                                                                                                                                                                      |                    |
| Background/rationale         | 2      | Explain the scientific background and rationale for the investigation being reported                                                                                                 | 3                  |
| Objectives                   | 3      | State specific objectives, including any prespecified hypotheses                                                                                                                     | 3                  |
| <b>Methods</b>               |        |                                                                                                                                                                                      |                    |
| Study design                 | 4      | Present key elements of study design early in the paper                                                                                                                              | 3                  |
| Setting                      | 5      | Describe the setting, locations, and relevant dates, including periods of recruitment, exposure, follow-up, and data collection                                                      | 3-4                |
| Participants                 | 6      | (a) Give the eligibility criteria, and the sources and methods of selection of participants. Describe methods of follow-up                                                           | 3-4                |
|                              |        | (b) For matched studies, give matching criteria and number of exposed and unexposed                                                                                                  |                    |
| Variables                    | 7      | Clearly define all outcomes, exposures, predictors, potential confounders, and effect modifiers. Give diagnostic criteria, if applicable                                             | 4                  |
| Data sources/<br>measurement | 8*     | For each variable of interest, give sources of data and details of methods of assessment (measurement). Describe comparability of assessment methods if there is more than one group | 4                  |
| Bias                         | 9      | Describe any efforts to address potential sources of bias                                                                                                                            |                    |
| Study size                   | 10     | Explain how the study size was arrived at                                                                                                                                            | 4                  |
| Quantitative variables       | 11     | Explain how quantitative variables were handled in the analyses. If applicable, describe which groupings were chosen and why                                                         | 4                  |
| Statistical methods          | 12     | (a) Describe all statistical methods, including those used to control for confounding                                                                                                | 4                  |
|                              |        | (b) Describe any methods used to examine subgroups and interactions                                                                                                                  | 4                  |
|                              |        | (c) Explain how missing data were addressed                                                                                                                                          | 4                  |
|                              |        | (d) If applicable, explain how loss to follow-up was addressed                                                                                                                       | 4                  |
|                              |        | (e) Describe any sensitivity analyses                                                                                                                                                | 4                  |
| <b>Results</b>               |        |                                                                                                                                                                                      | 4                  |

|                          |     |                                                                                                                                                                                                              |     |
|--------------------------|-----|--------------------------------------------------------------------------------------------------------------------------------------------------------------------------------------------------------------|-----|
| Participants             | 13* | (a) Report numbers of individuals at each stage of study—eg numbers potentially eligible, examined for eligibility, confirmed eligible, included in the study, completing follow-up, and analysed            | 5   |
|                          |     | (b) Give reasons for non-participation at each stage                                                                                                                                                         | 5   |
|                          |     | (c) Consider use of a flow diagram                                                                                                                                                                           |     |
| Descriptive data         | 14* | (a) Give characteristics of study participants (eg demographic, clinical, social) and information on exposures and potential confounders                                                                     | 5   |
|                          |     | (b) Indicate number of participants with missing data for each variable of interest                                                                                                                          | 5   |
|                          |     | (c) Summarise follow-up time (eg, average and total amount)                                                                                                                                                  | 5   |
| Outcome data             | 15* | Report numbers of outcome events or summary measures over time                                                                                                                                               | 5-6 |
| Main results             | 16  | (a) Give unadjusted estimates and, if applicable, confounder-adjusted estimates and their precision (eg, 95% confidence interval). Make clear which confounders were adjusted for and why they were included |     |
|                          |     | (b) Report category boundaries when continuous variables were categorized                                                                                                                                    |     |
|                          |     | (c) If relevant, consider translating estimates of relative risk into absolute risk for a meaningful time period                                                                                             |     |
| Other analyses           | 17  | Report other analyses done—eg analyses of subgroups and interactions, and sensitivity analyses                                                                                                               |     |
| <b>Discussion</b>        |     |                                                                                                                                                                                                              |     |
| Key results              | 18  | Summarise key results with reference to study objectives                                                                                                                                                     | 7   |
| <b>Limitations</b>       |     |                                                                                                                                                                                                              |     |
| Interpretation           | 20  | Give a cautious overall interpretation of results considering objectives, limitations, multiplicity of analyses, results from similar studies, and other relevant evidence                                   | 8   |
| Generalisability         | 21  | Discuss the generalisability (external validity) of the study results                                                                                                                                        | 8   |
| <b>Other information</b> |     |                                                                                                                                                                                                              |     |
| Funding                  | 22  | Give the source of funding and the role of the funders for the present study and, if applicable, for the original study on which the present article is based                                                | 8   |

\*Give information separately for cases and controls in case-control studies and, if applicable, for exposed and unexposed groups in cohort and cross-sectional studies.

**Note:** An Explanation and Elaboration article discusses each checklist item and gives methodological background and published examples of transparent reporting. The STROBE checklist is best used in conjunction with this article (freely available on the Web sites of PLoS Medicine at <http://www.plosmedicine.org/>, Annals of Internal Medicine at <http://www.annals.org/>, and Epidemiology at <http://www.epidem.com/>). Information on the STROBE Initiative is available at [www.strobe-statement.org](http://www.strobe-statement.org).

**Title:**

Improvement of Knowledge, Attitude and Perception of health care workers about ADR, a pre and post clinical pharmacists' interventional study

**Short title:** ADR and KAP study

**Authors:**

Hossein Khalili<sup>1</sup>, Niayesh Mohebbi<sup>1</sup>, Narjes Hendoiee<sup>1</sup>, Abbas-Ali Keshtkar<sup>2</sup>, Simin Dashti-Khavidaki<sup>1</sup>

1-Clinical Pharmacist, Department of Clinical Pharmacy, Faculty of Pharmacy, Tehran University of Medical Sciences, Tehran, Iran

2-Epidemiologist, Endocrinology and Metabolism Research Center, Tehran University of Medical Sciences- Gasterology and hepatology Research Center, Golestan University of Medical Sciences, Tehran, Iran

Corresponding Author:

Hossein Khalili

Department of Clinical Pharmacy, Faculty of pharmacy, Tehran University of Medical Sciences, Enghelab Ave, Tehran, Iran

Postal Code:1417614411

P.O.Box:14155/6451

Tel: +98-912-2979329

Fax: +98-21-66461178

E-mail: [khalilih@tums.ac.ir](mailto:khalilih@tums.ac.ir)

**Key words:** ADR, KAP, Clinical Pharmacy Interventions

**Word count:** 2454



## Abstract

**Purpose:** Health care workers have a main role in detection, assessment and spontaneous reporting of adverse drug reactions and improvement of their related knowledge, attitudes and perception is essential. The goal of this study was evaluation of clinical pharmacists' interventions in improvement of knowledge, attitude and perception of health care workers about adverse drug reactions in a teaching referral hospital, Tehran, Iran.

**Method:** Changes in knowledge, attitude and perception of health care workers of Imam teaching hospital about adverse drug reactions were evaluated before and after clinical pharmacists' interventions including workshops, meetings and presentations.

**Results:** From the 100 participated subjects, 82 of them completed the study. Fifty one percent of the health workers have been aware of Iranian Pharmacovigilance Center at ministry of health before intervention and after that all of the participants knew this center. About awareness and detection of adverse drug reactions in patients, 69(84.1%) of health care workers recognized at least one and following interventions it was improved to 73 (89%). Only 7 (8.5%) subjects of participants have reported adverse drug reactions in before intervention phase that were increased significantly to 18 (22%) after intervention.

**Conclusion:** Clinical Pharmacists' interventions were successful in improvement of health care workers' knowledge, attitude, and perception about adverse drug reactions and spontaneous reporting, in our hospital.

## Article Summary

**Article focus:** The goal of this study was evaluation of clinical pharmacists' interventions in improvement of knowledge, attitude and perception about adverse drug reactions in a referral teaching hospital, Tehran, Iran.

### Key messages:

-Our results showed that 91.5% of health care workers of the hospital never reported any ADR, and 49% were not even aware of Iranian Pharmacovigilance Center.

-Identifying previously unrecognized ADRs was the most important goal for ADR reporting in before and after the interventions phases of the study.

- Regarding the study results, it was suggested that health systems must to have training programs for their workers about importance, detection, analysis, reporting and follow-up of ADRs in the hospital and Provide online and telephone line accesses to facilitate ADRs reporting system.

### Strengths and limitation of this study:

-To the best of our knowledge this is the first survey in Iran that have evaluated clinical pharmacists' interventions in improvement of the health care professionals' knowledge, attitudes and perceptions regarding ADR.

- Our study was done in a single center with small sample size and short duration between pre and post interventions participants' assessment.

## Introduction

Adverse drug reactions (ADR) are a major cause of morbidity and mortality around the world and have high economic burden on health care systems [1-3]. Pharmacovigilance studies are more important for evaluating medication safety following drugs marketing [4]. Health care workers, especially medical practitioners are the principal contributors of ADR reports [5]. Health care professionals' knowledge, attitudes and perception about ADR have central role in improvement of patients' safety [1,5,6]. There are some concerns about ADR spontaneous reporting by health care workers including ADR importance, do not know how to report and fill the yellow cards, doubt about adverse effect and suspicious drug, lack of time, fear of legal problems, avoiding paper works and unavailable yellow card [1,5-7]. World Health Organization standards show that the best spontaneous reporting rate is over 200 reports per 1,000,000 populations per year. Consequently, in Iran with a population of over 70 million, it is expected to have at least 14,000 reports per year that unfortunately only 4,967 reports per year were sent to the Iranian Pharmacovigilance Center (IPC) [6].

Continuous education of health care workers about pharmacovigilance by oral presentations, verbal reminders, providing ADR newsletters by e-mail, mailing and direct distribution for hospital staff, advertisement, increased accessibility

1  
2  
3 of Yellow Cards, attending of pharmacist in the medical wards and involving  
4  
5  
6 actively in education and training of health care workers especially nurses and  
7  
8  
9 physicians were proposed for improvement of knowledge and attitude of health  
10  
11  
12 care workers about ADRs (8-10).

13  
14  
15 The goal of this study was evaluation of clinical pharmacists' interventions in  
16  
17 improvement of knowledge, attitude and perception about adverse drug  
18  
19 reactions in a referral teaching hospital, Tehran, Iran.

## 21 22 23 **Method**

24  
25 In this study, changes in knowledge, attitude (perspective toward ADR and way  
26  
27 of understanding or awareness of saying and doing about that) and perception (  
28  
29 the ADR) of health care workers of Imam Khomeini Complex Hospital (a  
30  
31 tertiary referral hospital with 1200 beds that is affiliated to Tehran university of  
32  
33 Medical sciences, Tehran, Iran), about ADRs were evaluated before and after  
34  
35 clinical pharmacists' interventional study. Based on WHO definition ADR was  
36  
37 considered as any noxious, unintended, and undesired effect of a drug that  
38  
39 occurs at doses used in humans for prophylaxis, diagnosis, or therapy. To assess  
40  
41 knowledge, attitude and perception of health care workers about ADR a validate  
42  
43 questionnaire [1] was used. The questionnaire consisted of a total of 15  
44  
45 Questions (5 questions for each of the knowledge, attitude and perception).  
46  
47 Multiple choice questions about ADR definition, goals and importance of  
48  
49 pharmacovigilance, and types of drugs induced reactions that must be reported  
50  
51 was used for evaluation of the participants' knowledge. For evaluation of  
52  
53  
54  
55  
56  
57  
58  
59  
60

1  
2  
3 attitude and perception some cases with drug induced ADRs were designed and  
4  
5  
6 asked from the participants to determine which of them must be reported.  
7  
8

9  
10 In the first phase of the study, the clinical pharmacists (3 persons) attended in  
11 different medical wards of the hospital and invited from all health care workers  
12 (medical students, nurses, physicians and pharmacist) to participate in the study.  
13  
14 From whom those had enough time and were happy with our program schedule  
15 asked to fill the questionnaire. Then the participants were invited to attend in an  
16 educational program (clinical pharmacists' interventions) in the hospital.  
17  
18 Clinical pharmacists' interventions included training workshops (providing  
19 lectures and group discussion, 3 hours per week for 4 consecutive weeks) and  
20 continuous providing information at the hospital morning case report section  
21 (every other day for one month) about ADR importance, seriousness,  
22 preventability, necessity of reporting, and spontaneous reporting system and its  
23 advantages. In the workshop they learned to fill a yellow card and emphasized  
24 on reporting any suspected reaction regardless of uncertainty about the  
25 causality. After three months the same questionnaire were filled again by the  
26 participants in the educational programs. Effects of clinical pharmacists'  
27 interventions in improvement of knowledge, attitude and perception of the  
28 participants about ADR were evaluated by comparing their responses to the  
29 questions before and after interventions. All data were analyzed by Statistical  
30 Package for Social Sciences (SPSS) software version 16.0. Results were  
31 reported as frequency and for comparing the before and after intervention's  
32 results, we used Crosstabulation and Chi- Square test. Values less than 0.05  
33 were considered as significant.  
34  
35  
36  
37  
38  
39  
40  
41  
42  
43  
44  
45  
46  
47  
48  
49  
50  
51  
52  
53  
54

## 55 56 Results

57  
58  
59 From 136 health care workers that were positive for our invitation, only 100  
60 persons attended in the educational programs regularly and from them 82

1  
2  
3  
4 questionnaires were filled out both before and after intervention with same  
5 name. The questionnaires that were filled only in one phases of the study were  
6 excluded. Thirty five men and 47 women including 7 (8.5%) physicians, 31  
7 (37.8%) residents, 26 (31.7%) interns, 17 (20.7%) nurses and one (1.2%)  
8 pharmacist participated in the study. We had not any intention to invite senior or  
9 junior of the wards and based on the demographic data of the study we had  
10 participants from the both groups. Average age of the participants was 30.9  
11 years with standard deviation of 6.7 years.

12  
13  
14  
15  
16  
17  
18  
19  
20  
21 Fifty one percent (n=42) of the health care workers were aware of IPC at Iranian  
22 ministry of health before interventions and after that all of the participants knew  
23 this center. Four people (4.9%) had attended in an ADR workshop prior to this  
24 study. Sixty nine (84.1%) of subjects had recognized at least one ADR before  
25 and following interventions 73 (89%) of cases have identified ADR. Only 7  
26 (8.5%) people have reported ADR before intervention that was increased  
27 significantly to 18 (22%) by the interventions (P<0.001).

28  
29  
30  
31  
32  
33  
34  
35  
36 One of question was designed to determine center that ADRs were reported  
37 previously by the participants. Two (2.4%) responders had sent the ADR reports  
38 to IPC in Tehran, 1(1.2 %) to Food and Drug Organization in another city of  
39 Iran, 1 (1.2 %) to the manufacture, and 4 (4.9%) to hospital's ADR center before  
40 the interventions and after that, reporting to IPC increased to 17 (20.7%) of  
41 cases (P<0.001).

42  
43  
44  
45  
46  
47  
48  
49  
50 Doubt about occurrence of an ADR didn't alter with the interventions  
51 significantly (63.4% vs. 69.5%). Reasons that caused the participants did not  
52 report ADR were shown in table 1. The interventions had considerable impact  
53 to reduce causes of underreporting including did not know how to report (p =  
54 0.002), yellow card not available (p = 0.039), lack of enough information about  
55 the patient (p < 0.0001).

1  
2  
3  
4 All types of ADR that might promote health care professionals for reporting  
5 them were improved significantly after clinical pharmacists' interventions  
6 (Table 2).  
7  
8

9  
10 The next questions were about health care workers' perception about ADR and  
11 spontaneous ADR reporting goals. As it was indicated in table 3 our  
12 interventions had a significant effect on the participants' total perception about  
13 ADR spontaneous reporting.  
14  
15  
16  
17

18 Responders' perception about spontaneous reporting was not improved  
19 significantly following the clinical pharmacists' interventions (Table 4). Fifty  
20 five (67.1%) and 60 (73.2%) of subjects believed that it is a professional  
21 responsibility at pre and post interventional phases of the study respectively.  
22  
23  
24

25 Regarding the participants' attitude for reporting ADRs the question was; in  
26 which of the fallowing conditions (carbamazepine induced agranulocytosis,  
27 hypoglycemia following use of a new hypoglycemic agent, a new statin induced  
28 myalgia, weight loss following fluoxetine therapy in a young women,  
29 amoxicillin induced skin rash, pedal edema following amlodipine therapy,  
30 bronchospasm following use of new beta blocker, and a new antiepileptic  
31 induced paresthesia) you will fill the yellow card? Only reporting of serious  
32 reactions such as carbamazepine induced agranulocytosis was improved by  
33 clinical pharmacists' interventions.  
34  
35  
36  
37  
38  
39  
40  
41  
42  
43  
44

45 The participants' preferred systems to report an ADR have been indicated in  
46 table 5. Yellow card, online, telephone and fax were frequent preferred methods  
47 for ADRs reporting in this study respectively (Table 6).  
48  
49  
50

## 51 Discussion

52 To the best of our knowledge this is the first survey in Iran that have evaluated  
53 clinical pharmacists' interventions in improvement of the health care workers'  
54 knowledge, attitudes and perceptions regarding ADR.  
55  
56  
57  
58  
59  
60

1  
2  
3 Our results showed that 91.5% of health care workers of our hospital that  
4 participated in the study never reported any ADR, and 49% of them were not  
5 even aware of IPC at first phase of the study and obviously improved after  
6 interventions. Iranian pharmacists are more aware about IPC (6) that may be  
7 related to pharmacists' more education about drugs' safety.  
8  
9

10 Before the clinical pharmacists' interventions a little (2.4%) of responders sent  
11 ADR reports to IPC at the Ministry of Health and after that all of reports have  
12 set to this center. It shows that interventions improve participant information  
13 regarding the center that is responsible for analyzing and managing of their  
14 reports. In previous research in Shiraz, Iran [1], 11% of the reports were sent to  
15 IPC.  
16  
17

18 The considerable numbers of health care workers in present study never  
19 reported an ADR that is comparable with other studies [4,6,11]. In the first  
20 phase of the study the main reasons of under reporting of ADR were in order of  
21 had not enough information from the patient, too well known to report, did not  
22 know how to report, uncertain association, and being unaware of the existence  
23 of a national ADR reporting system.  
24  
25

26 Although there are many studies [12-18] that assess some causes of under  
27 reporting ADR, a little of them have evaluated these barriers in hospitals.  
28 Results of a study performed in a tertiary teaching hospital in Barcelona / Spain  
29 are similar to our study and lack of time to report an ADR due to the workload  
30 of clinical practitioners was detected as the most important reason to ADR  
31 under- reporting. Other causes of under-reporting in that study were lack of  
32 information about the spontaneous reporting system, unavailability of yellow  
33 cards, doubt of ADR causality assessment and lack of patient confidentiality  
34 [12]. Other reasons for under-reporting of an ADR in other studies were  
35 diagnosed as uncertain association, too trivial to report, too well known to  
36  
37  
38  
39  
40  
41  
42  
43  
44  
45  
46  
47  
48  
49  
50  
51  
52  
53  
54  
55  
56  
57  
58  
59  
60



1  
2  
3 report, yellow card unavailability, lack of time, and not knowing how to report  
4 [13-18].  
5  
6  
7

8  
9 In present study serious and unusual reactions, unreported ADR at before, and  
10 reactions to a new product were selected as more important ADR for reporting  
11 by the participants. These are as the same as other studies' results [19-23]. We  
12 found only one study in that the idea of reporting all kind of ADRs was more  
13 often selected by pharmacist than reporting only serious and unexpected  
14 reactions [24]. After the study's interventions, believe of reporting of all drug  
15 related reactions have been increased significantly.  
16  
17  
18  
19  
20  
21  
22

23  
24 Identifying previously unreported ADR was the most important goal for ADR  
25 reporting in before and after the interventions of the study. This was also  
26 reported by other studies [25,26]. Regarding the influence of the clinical  
27 pharmacists' interventions on modifying health care workers' perception about  
28 ADR, just reporting carbamazepine induced agranulocytosis showed a  
29 significant change, which indicated reporting of a serious reaction.  
30  
31  
32  
33  
34  
35  
36

37 The preferred method to report an ADR was yellow card followed by online  
38 report in both before and after the interventions. In previous study in Iran,  
39 Phone was the selected method for ADR reporting by pharmacists [1].  
40  
41  
42  
43

44 Our study was a single center study with small sample size and short duration  
45 between pre and post clinical pharmacists' interventions participants'  
46 evaluation. It seems that the consequence of the interventions will be pale over  
47 time. Another limitation of our survey was incomplete filled questionnaires that  
48 consequently we couldn't enroll all 100 questionnaires for the analysis.  
49  
50  
51  
52  
53

54  
55 Educational program including workshops, oral presentations, group discussion,  
56 designing ADR newsletters in hospitals, providing information about  
57 pharmacovigilance for health care workers by mail, e-mail, verbal reminders,  
58 advertisement, and continuous education of nurses, physicians and pharmacists  
59  
60

1  
2  
3 about ADRs, regular attending of pharmacists in the medical wards and  
4  
5 involving actively in patient's pharmaceutical care are essential for improving  
6  
7 health care workers knowledge, attitude and perception about ADRs (7-10).  
8  
9

10  
11 In conclusion clinical pharmacists' interventions can improve knowledge,  
12  
13 attitude, and perception of health care workers about ADR that is a great issue  
14  
15 of importance regarding pharmacovigilance and public health.  
16

17  
18 **Authorship:**

19  
20  
21 Hossein khalili and Simin Dashti-Khavidaki: Clinical pharmacists of the  
22  
23 hospital and provided educational programs for the participants to the study and  
24  
25 manuscript revision.  
26

27  
28 Niayesh Mohebibi: Data gathering and manuscript preparation.  
29

30  
31 Narjes Hendoiee: Data gathering and provided educational program for the  
32  
33 participants to the study.  
34

35  
36 Abbas-Ali Keshtkar: Study design and statistical analysis.  
37

38  
39 **Acknowledgements:** This study was supported by a grant from Office of Vice-  
40  
41 Chancellor for Research of Tehran University of Medical Sciences.  
42

43  
44 **Conflict of interest:** There is not any competing interest for all authors about  
45  
46 present work.  
47

48  
49 **Funding:** We have not any founding resource.  
50  
51  
52  
53  
54  
55  
56  
57  
58  
59  
60

## References:

1. Vessal G, Mardani Z, Mollai M. Knowledge, attitudes, and perceptions of pharmacists to ADR reporting in Iran. *Pharm World Sci* 2009;**31**:183–187.
2. Lazarou J, Pomeranz BH, Corey PH. Incidence of ADR in hospitalized patients: a meta-analysis of prospective studies. *JAMA* 1998;**279**:1200-1205.
3. Millar JS. Consultation owing to ADR in a single perception. *Br J Gen Pract* 2001;**51**:130-1.
4. Figueiras A, Tato F, Fontañás J, et al. Physicians' attitudes towards voluntary reporting of adverse drug events. *J Eval Clin Pract* 2001;**7**:347-54.
5. Rawlins MD. Pharmacovigilance: paradise lost, regained or postponed? The William Withering Lecture 1994. *J R Coll Physicians Lond* 1995;**29**:41-9.
6. Vallano A, Cereza G, Pedròs C, et al. Obstacles and solutions for spontaneous reporting of ADRs in the hospital. *Br J Clin Pharmacol* 2005;**60**:653–658.
7. Salehifar E., Ala SH., Gholami KH., Knowledge, attitudes, and perceptions of pharmacists and Nurses ADR reporting in Mazandaran ,Iran. *Mazandaran university of medical science journal* 2007;**56**:115-125.
8. Fincham JA. Statewide program to stimulate reporting of adverse drug reactions. *J Pharm Pract* 1989;**2**: 239-244.
9. McGettigan P, Golden J, Conroy RM, Arthur N, Feely J. Reporting of adverse drug reactions by hospital doctors and the response to intervention. *Br J Clin Pharmacol* 1997; 44: 98-100.
10. Nazario M, Feliu JF, Rivera GC. Adverse drug reactions: the San Juan Department of Veterans Affairs Medical Center experience. *Hosp Pharm* 1994; 244: 249-250.
11. Cosentino M, Leoni O, Oria C, et al. Hospital-based Survey of Doctors' Attitudes to ADRs and Perception of Drug-related Risk for Adverse Reaction Occurrence. *Pharmacoepidemiol Drug Safety* 1999;**8**:S27-S35.

12. Evans SM, Berry JG, Smith BJ, et al. Attitudes and barriers to incident reporting: a collaborative hospital study. *Qual Saf Health Care* 2006;**15**:39–43.
13. Bateman DN, Sanders GL, Rawlins MD. Attitudes to ADR reporting in the Northern Region. *Br J Clin Pharmacol* 1992;**34**: 421–6.
14. Belton KJ, Lewis SC, Payne S, et al. Attitudinal survey of ADR reporting by medical practitioners in the United Kingdom. *Br J Clin Pharmacol* 1995;**39**:223–6.
15. Eland IA, Belton KJ, van Grootheest AC, et al. Attitudinal survey of voluntary reporting of ADR. *Br J Clin Pharmacol* 1999;**48**:623–7.
16. Bäckström M, Mjorndal T, Dahlqvist R, et al. Attitudes to reporting ADR in northern Sweden. *Eur J Clin Pharmacol* 2000;**56**:729–32
17. McGettigan P, Feely J. ADR reporting: opinions and attitudes of medical practitioners in Ireland. *Pharmacoepidemiol Drug Saf* 1995;**4**:355–8.
18. Belton KJ. Attitude survey of adverse drug-reaction reporting by health care professionals across the European Union. The European Pharmacovigilance Research Group. *Eur J Clin Pharmacol* 1997;**52**:423–7.
19. Green CF, Mottram DR, Rowe PH, et al. Attitudes and knowledge of hospital pharmacists to ADR reporting. *Br J Clin Pharmacol* 2001;**51**:81–6.
20. Lee KK, Chan TY, Raymond K, et al. Pharmacists' attitudes toward ADRs reporting in Hong Kong. *Ann Pharmacother* 1994;**28**:1400–3.
21. Sweis D, Wong IC. A survey on factors that could affect ADR reporting according to hospital pharmacists in Great Britain. *Drug Saf* 2000;**23**:165–72.
22. Generali JA, Danish MA, Rosenbaum SE. Knowledge of and attitudes about ADR reporting among Rhode Island pharmacists. *Ann Pharmacother* 1995;**29**:365–9.
23. Figueiras A, Tato F, Fontainas J, et al. Physicians' attitudes towards voluntary reporting of adverse drug events. *J Eval Clin Pract* 2001;**7**:347–54.
24. Zerrin Toklu H, Uysal MK. The knowledge and attitude of the Turkish community pharmacists toward pharmacovigilance in the Kadikoy district of Istanbul. *Pharm World Sci* 2008;**30**:556– 62.
25. Belton KJ, Lewis SC, Payne S, et al. Attitudinal survey of ADR reporting by medical practitioners in the United Kingdom. *Br J Clin Pharmacol* 1995;**39**:223–6.
26. Cosentino M, Leoni O, Banfi F, et al. Attitudes to ADR reporting by medical practitioners in a northern Italian district. *Pharmacol Res* 1997;**35**:85–8.

Table 1 – Reasons that cause ADR not be reported

| Reason                                                      | Before intervention | After intervention | P value |
|-------------------------------------------------------------|---------------------|--------------------|---------|
| Uncertain association between reaction and drug             | 18(22)              | 17(20.7)           | 1       |
| Unimportant to report                                       | 13(15.9)            | 11(9)              | 0.30    |
| Well known that don't need to be reported                   | 21(25.6)            | 16(19.5)           | 0.23    |
| Unaware of the existence of a national ADR reporting system | 17(20.7)            | 15(18.3)           | 0.62    |
| Did not know importance of reporting                        | 12(14.6)            | 10(12.2)           | 0.69    |
| Did not know how to report                                  | 20(24.4)            | 12(14.6)           | 0.02    |
| Lack of time                                                | 11(13.4)            | 16 (19.50)         | 0.18    |
| Lack of financial reimbursement                             | 2(2.4)              | 2(2.4)             | 1       |
| Fear of legal liability                                     | 2(2.4)              | 2(2.4)             | 1       |
| Yellow card not available                                   | 16(19.5)            | 9(11)              | 0.04    |
| Reporting system is too technical                           | 18(9.8)             | 14(4.9)            | 0.12    |
| Not enough information from the patient                     | 82(100)             | 3(3.7)             | 0.0001  |

Table 2 - Reactions characteristics that might encourage health care professionals to report

| Factor                                                                            | Before intervention | After intervention | P value |
|-----------------------------------------------------------------------------------|---------------------|--------------------|---------|
| A serious reaction                                                                | 53(64.6)            | 74(90.2)           | <0.001  |
| Unusual reaction                                                                  | 38(46.3)            | 66(80.5)           | <0.001  |
| Reaction of a new product                                                         | 36(43.9)            | 46(56.1)           | 0.02    |
| Reaction not reported before for a particular drug                                | 36(43.9)            | 66(80.5)           | <0.001  |
| Reaction is well recognized for a particular drug                                 | 8(9.8)              | 31(37.8)           | <0.001  |
| Any reaction (serious or non-serious, well-known or new) to an old or new product | 7(20.7)             | 26(31.7)           | 0.004   |

Table 3 - Health care workers' perception about ADR and spontaneous reporting systems' goals, before and after intervention.

| Goal                                                       | Before intervention | After intervention | P value |
|------------------------------------------------------------|---------------------|--------------------|---------|
| To enable safe drugs to be identified                      | 36(43.9)            | 46(56.1)           | 0.02    |
| To measure the incidence of ADR                            | 39(47.6)            | 57(69.5)           | <0.001  |
| To identify factors which might predispose to ADR          | 35(42.7)            | 58(70.7)           | <0.001  |
| To identify previously unrecognized ADRs                   | 56(68.3)            | 70(85.4)           | <0.001  |
| To compare ADRs for drugs in similar therapeutic classes   | 36(43.9)            | 52(63.4)           | <0.001  |
| To compare ADRs of same drug from different drug companies | 44(53.7)            | 44(53.7)           | 1       |

Table 4- Beliefs about spontaneous reporting, before and after intervention

| Believes about spontaneous reporting                       | Before intervention | After intervention | P value |
|------------------------------------------------------------|---------------------|--------------------|---------|
| Professional responsibility                                | 55(67.1)            | 60(73.2)           | 0.12    |
| Felt that one report can not modify the health-care system | 6(7.3)              | 6(7.3)             | 1       |
| All serious ADRs were recognized before drug marketing     | 3(3.7)              | 1(1.2)             | 0.5     |
| Completely aware of what should be reported                | 4(4.9)              | 8(9.8)             | 0.06    |
| Yellow-cards are too complicated                           | 19(23.2)            | 18(22)             | 1       |



Table 5 – Health care workers' attitude for reporting; some instances of ADR

| Event                                                                                 | Category of reaction                               | Report before the intervention | Report after the intervention | P value |
|---------------------------------------------------------------------------------------|----------------------------------------------------|--------------------------------|-------------------------------|---------|
| Carbamazepine induced agranulocytosis                                                 | serious                                            | 30(36.6)                       | 74(90.2)                      | <0.001  |
| Hypoglycemic's coma of a new diabetes medication                                      | Serious for a new drug                             | 48(58.5)                       | 45(54.9)                      | 0.72    |
| Myalgia with a new statin                                                             | New drug                                           | 19(23.2)                       | 20(14.2)                      | 1       |
| Weight loss after 8 week of fluoxetine                                                | well recognized for a particular drug              | 69(7.3)                        | 13(15.9)                      | 0.14    |
| Rash with amoxicillin after 6 days treatment                                          | well recognized for a particular drug              | 18(22)                         | 12(14.6)                      | 0.33    |
| Foot edema after 4 month amlodipine treatment                                         | well recognized for a particular drug              | 19(23.2)                       | 18(22)                        | 1       |
| Pain and tingling of tongue after two weeks of a new anti- seizure therapy            | Reaction not reported before for a particular drug | 33(40.2)                       | 40(48.8)                      | 0.34    |
| Bronchospasm in an asthmatic patient after the first administration of a beta-blocker | Serious well recognized for a particular drug      | 33(40.2)                       | 29(35.4)                      | 0.63    |

Table 6- Health care workers' preferred method for reporting of ADR

| Preferred method | Before intervention | After intervention | P value |
|------------------|---------------------|--------------------|---------|
| Yellow Card      | 29(32)              | 34(45.1)           | 0.09    |
| Telephone        | 18(24.3)            | 16(21.6)           | 0.21    |
| Fax              | 1(1.4)              | 0                  | 0.33    |
| Online           | 21(28.4)            | 23(31.1)           | 0.45    |
| None             | 5(6.8)              | 1(1.4)             | 0.02    |

For peer review only
